# Supplementary material for: Characterization of Family D DNA polymerase from Thermococcus sp. 9°N
Source: PubMed Central journal article supplement (PMC4065339; doi:10.1007/s00792-014-0646-9), 2014-05-03
Supplement: 792_2014_646_MOESM1_ESM.pdf [file 792_2014_646_MOESM1_ESM.pdf]

# A. polD-S multiple sequence alignment

|                         |                                                     |     |
|-------------------------|-----------------------------------------------------|-----|
| <i>T. species</i> 9°N   | --MLIEDLIK NKYLITPSAYYLLEPHYKR-DFTLAELIKFAKARGTFVID | 47  |
| <i>T. kodakaraensis</i> | --MLVEDLLKNNYLITPSAYYLLSDHYKK-AFTLAELIKFAKNRGTFFVD  | 47  |
| <i>P. furiosus</i>      | MDEFVKSLLKANYLITPSAYYLLREYYEKGEFSIVELVKFARSRESYIIT  | 50  |
| <i>M. jannaschii</i>    | -MEIINKFLDLEALLSPTVYKLNKFNDEEKLKRLIQKIREFKKYNNAFIL  | 49  |
| <i>M. maripaludis</i>   | ---MINDFLNIQVLLAPESYSRLQNLDSNDFSDLFNKIKEFKSKKDDFIL  | 47  |
| <i>H. volcanii</i>      | --MPLETPARIVRTLVRGRGYNAREAVTLIAGSDDPGRTLAR-----     | 40  |
| <i>H. species</i> NRC-1 | -----                                               |     |
| <i>A. fulgidus</i>      | -----MVIKNIDAATVAKKFLVRGYNIDPKAAELICKSGLFS-----     | 37  |
| <i>T. acidophilum</i>   | -----MVIWFFYGRKIMHLS---LKRIIVCKMS-----              | 27  |
|                         |                                                     |     |
| <i>T. species</i> 9°N   | SSIAEAFLEKGLFSTG---ELTEQTPLEVSEE-----EPLASREEI      | 87  |
| <i>T. kodakaraensis</i> | SNLAREFLAEKGIISGNGALDGSVLSGISVSESPVKPNGEAVLESESEDE  | 97  |
| <i>P. furiosus</i>      | DALATEFLKVKG-----                                   | 62  |
| <i>M. jannaschii</i>    | LDEKFLDIFLQKDLDEI-----                              | 66  |
| <i>M. maripaludis</i>   | LDSHFLNIFLGNNLNKI-----                              | 64  |
| <i>H. volcanii</i>      | -----                                               |     |
| <i>H. species</i> NRC-1 | -----                                               |     |
| <i>A. fulgidus</i>      | -----                                               |     |
| <i>T. acidophilum</i>   | -----                                               |     |
|                         |                                                     |     |
| <i>T. species</i> 9°N   | HGDFAESAEIPVSETVTASRPEEIPSEDFESAEASSISTGDVVESEVA    | 137 |
| <i>T. kodakaraensis</i> | SGAIESSLQEGVEDGVESIAEPSAASVEDVVVAGESSLASEGSSLEDEIN  | 147 |
| <i>P. furiosus</i>      | -----LEPILP                                         | 68  |
| <i>M. jannaschii</i>    | -----                                               |     |
| <i>M. maripaludis</i>   | -----                                               |     |
| <i>H. volcanii</i>      | -----                                               |     |
| <i>H. species</i> NRC-1 | -----                                               |     |
| <i>A. fulgidus</i>      | -----                                               |     |
| <i>T. acidophilum</i>   | -----                                               |     |
|                         |                                                     |     |
| <i>T. species</i> 9°N   | TASSGEESVPEP-AEIIG----ETSISTGTAPELEQSLTLNSVEEPPVSGE | 181 |
| <i>T. kodakaraensis</i> | TEPELSSMDDGAEVVQSSEGEETSISTGNALGSVDYGGSDSESEALEEA   | 197 |
| <i>P. furiosus</i>      | VETKGG-----FVSTGESQKEQSYEESFGTKKEEISQE              | 100 |
| <i>M. jannaschii</i>    | -----INEYKDFDFIFYYTGEEKEKPKVE                       | 91  |
| <i>M. maripaludis</i>   | -----FEEYGKDFLAYYTSNEVASEEKII                       | 89  |
| <i>H. volcanii</i>      | -----VVEAAPDDALRITADHVREVLASA                       | 64  |
| <i>H. species</i> NRC-1 | -----                                               |     |
| <i>A. fulgidus</i>      | -----DELVDKICRIANGGFIEKSVV                          | 59  |
| <i>T. acidophilum</i>   | -----QLDRTSLIQYFNSNGVLISPEAL                        | 50  |
|                         |                                                     |     |
| <i>T. species</i> 9°N   | ISEGESFVSTGTPPEHEELVDEAAGSLDSSLTEVVEDSLPVEAEPLNGNGY | 231 |
| <i>T. kodakaraensis</i> | SSGGESFISTGTPEDALLEESPEGEFPDENGFSDES L PVENG--SENGY | 245 |
| <i>P. furiosus</i>      | IKEGESFISTGS---EPLLEELN-----SIGIEEIG-----           | 128 |
| <i>M. jannaschii</i>    | KK-EIKKETEEKIEKEKIEFVKKEEKE-----                    | 117 |
| <i>M. maripaludis</i>   | EKDDFEPVNEVKLENEEIEPKRENK-----                      | 115 |
| <i>H. volcanii</i>      | PAADPSGTEPTP-----                                   | 76  |
| <i>H. species</i> NRC-1 | -----                                               |     |
| <i>A. fulgidus</i>      | EEFLRNLSN-----                                      | 68  |
| <i>T. acidophilum</i>   | DK-LIKYSSSSLIED-----                                | 64  |
|                         |                                                     |     |
| <i>T. species</i> 9°N   | GNYTDSEYYENGENGNGVVKPKIVYGDYGIPIAYVG-EDVEGEKSYSTYE  | 280 |
| <i>T. kodakaraensis</i> | G---DSEYYENGDN--GVKPKIVYGDYGVPIAYVADETPEEKAYSTYS    | 290 |
| <i>P. furiosus</i>      | ---ANEELVSNNGND--NGGEAIVFDKYGYPMVYAPEEIEVEEKEYSKYE  | 172 |
| <i>M. jannaschii</i>    | -----QFIKKSDEDVEEKLKQLISKEEKEDFDA                   | 146 |
| <i>M. maripaludis</i>   | -----VYDLDFEDIEEEEPELDEIHKKLE--E                    | 140 |
| <i>H. volcanii</i>      | -----PAAADAANAADADPAASAASDPVSAATSH                  | 106 |
| <i>H. species</i> NRC-1 | -----                                               |     |
| <i>A. fulgidus</i>      | -----LKPATLTPRPEE-----                              | 80  |
| <i>T. acidophilum</i>   | -----LIKNSDGYIDEK-----                              | 76  |
|                         |                                                     |     |
| <i>T. species</i> 9°N   | DVVIKPKEGFHYRAKEIPDEWELTFDVKNVKFEAPKVKNAASKEGEIIO   | 330 |
| <i>T. kodakaraensis</i> | DLVIAPKEGFHYRAKEIPDEWELAFDVKNVKFEVVKVNAQSKEGEVIO    | 340 |
| <i>P. furiosus</i>      | DLTIPMNPDFNY--VEIKEDYDVVFDVRNVKLPKPKVKNKGKGEIIVE    | 220 |
| <i>M. jannaschii</i>    | ERAKRYEHITKIKESVNSRIKWIAKDIDAVIEIYEDSDVSGKSTCTGTIE  | 196 |
| <i>M. maripaludis</i>   | ERKERILEVRSIRESVNNKINYAKDIDAQIHVYDEYDVTGKSTCEGTL    | 190 |
| <i>H. volcanii</i>      | DNAAHTDQSAPAEAQGTTPGGRNVDPALRSLEIAN---DMTGQSTGTGEYD | 153 |
| <i>H. species</i> NRC-1 | -----MTGASTGTGEYQ                                   | 12  |
| <i>A. fulgidus</i>      | ---RKVEEVKAS-----CIALKVIKIDITGKSSCQGNVE             | 110 |
| <i>T. acidophilum</i>   | -YVERYVSRPKVRN-----DYEYVLP-DVR---FNASIE             | 105 |

*T. species 9°N* AYSSYFKSRLRKMRRIFRENPEIGTVIDI AKLSYVRDDE-VTIIGLVNDK 379  
*T. kodakaraensis* AYSSYFKSRLKKMRRIFRENPEIGTVIDI AKLSYVREDD-VTIIGLVNEK 389  
*P. furiosus* AYASLFRSRLKKLRKILRENPELDNVVDIGKLYVKEDETVTIIGLVNSK 270  
*M. jannaschii* DFVKYFRDRFERLKVFERKAQRKGYPLKDIKMKGQKD-IFVVGIVSDV 245  
*M. maripaludis* DFVKYFKDRCSLTKRIIELNQKAYPLNQLFRKKENE-VFIAGIVSDV 239  
*H. volcanii* DFVKYFRDRYKLSKLLRGRVNRHPAKAISNMSGGEDAE---LIGLVDDV 200  
*H. species NRC-1* DFVSVFRDYYDRLAAQLRGRVNRHPTSALASMPGGSDAA---IVGMVNDI 59  
*A. fulgidus* DFLMYFNSHLEKLSRIIRSRVNTTP----IAHAGKVRGN-VSVVGMVNEV 155  
*T. acidophilum* DFRKMFVSKYEKLSKIITSSSSMRG-SISIKTAKRSQGE-VKVVGMVSEV 153

*T. species 9°N* RETAKG-YMFEVEDATGRVKVFLGRDKENASQAYNAIMPDSVVAFRG--- 425  
*T. kodakaraensis* RETRKG-YLFEIEDATGRIVKFIGSDKEGANEAYSTIMPDSVVAFRG--- 435  
*P. furiosus* REVNKG-LIFEIEDLTGKVKVFLPKDSEDYREAF-KVLPDAVVAFKG--- 315  
*M. jannaschii* DSTRNGLNIVRIEDTEDEATLILPKEKLEAGKIPDDILLDEVIGAIGTVS 295  
*M. maripaludis* NSTKNGHKMVELEDENGTFRVLLMKDKMEKGLDPSDVLLDEVIGFEGTIN 289  
*H. volcanii* RSTKSGHWIIDLEDTTGTFPCLVMKDKDIAGYVDELLMDECTIAVQGT--- 247  
*H. species NRC-1* RSTTSGHWRVELEDTNGVFPVLVKDRDVS DLVDDLLLDEVIASVGT--- 106  
*A. fulgidus* YE-RGDKCYIRLEDTTGTTICVATGKN---AEVARELLGDEVIGVTG-LL 200  
*T. acidophilum* SMTKNGHKRIVIEDLDDSTITAIVMKD---RGPVNEIILEDEVIGIIGSVS 200

*T. species 9°N* QPG-RGIFFANRVFLPDVFKFREKPPLEEKVYAILLSDIHVGSNKFCCK 474  
*T. kodakaraensis* TPG-KGIFFANRVFLPDVFKFRSKPPLEEKVYAILLSDIHVGSNKFCCE 484  
*P. furiosus* VYSKRGILYANKFYLPDVLRYRQKPPLEEKVYAILLSDIHVGSKEFCEN 365  
*M. jannaschii* KSGS--SIVDEIIRPALE-PKEP-KRIDEEIYMAFLSDIHVGSKEFLHK 341  
*M. maripaludis* DKGD--LMFVDRAFRPDIT-PKPT-KTDEKIYTAFLSDVHVGSREFLNK 335  
*H. volcanii* LSGDAGILFVDSMHFPDVERSHRSN-TADDRVQAALISDVHVGSQEFMAD 296  
*H. species NRC-1* LADDGTILFADDIYFPEVERTYSPS-TADRSVQAALISDVHVGSQEFMAD 155  
*A. fulgidus* KGSS--LYANRIVFPDVE-INGN-GEKCRDFYIVFLSDTHFSSKEFLEK 245  
*T. acidophilum* QSSKDPVIFVNEIIRPDIE-YRVIDEEKHEPVVASISDIHVGSKTRKRN 249

*T. species 9°N* AFEKFLEWLNGEVNSRAEELVSRIKYMIGEDVVDGVIYPGQYNEILAI 524  
*T. kodakaraensis* AFIKFLEWLNGEVNSRTEEELVSRIKYYIIGEDVVDGVIYPGQYNEILAI 534  
*P. furiosus* AFIKFLEWLNGVNETKEEEIIVSRVKYLIIGEDVVDGVIYPGQYADITI 415  
*M. jannaschii* EFEKFIRFLNGVDNLEEKVVSRLKYICIAEDLVDGVIYPGQEEEDLYE 391  
*M. maripaludis* VFAKFIRFLNGEVNNGLEEKIVSRLKYISIAEDLVDGVIYPGQEYDLYD 385  
*H. volcanii* AWRNFADWLHTEEAAR-----IEMLLIAGDMVEGVGVYVPGDEEDVD 338  
*H. species NRC-1* AWRSFADWLHTPAAES-----VEMLLIAGDMVEGVGVYVPGDEEDI 197  
*A. fulgidus* EWEMFVRWLKGEVGGKKSQNLAEKVKYIVIAEDIVDGIYVPGQEDDLAI 295  
*T. acidophilum* EFEAMVRWISGSDPD-----ASRVKYLILSDVVDGVIYVPGQENDEI 293

*T. species 9°N* PDIFDQYEALANLLRNVDHITMFIGPGNHDAARTALPOPGFYEEYAKPI 574  
*T. kodakaraensis* PDIFDQYEALANLLKQVVDHITMFIGPGNHDAARTALPOPGFYEEYAKPL 584  
*P. furiosus* PDIFDQYEALANLLSHVFKHITMFIAIPGNHDAARQAIPOPEFYKEYAKPI 465  
*M. jannaschii* VDIIEQYREIAMYLQIPEHISIIISPGNHDAVRPAEPOPKLPEKITK-L 440  
*M. maripaludis* VDIISOYAEVAAYLEQVEHIVKIICPGNHDAVRPAEPOPTDESITSL-L 434  
*H. volcanii* IDIIEQYEAFAEHLKSVPGDLEIVMIPGNHDAVRLAEPOPGDDELDRD-I 387  
*H. species NRC-1* VDIYDQYETFAEHLKDVPGDMEIVMIPGNHDAVRLAEPOPADDELRS-I 246  
*A. fulgidus* SDIYQYEFAAASHLEIPEKIKLIVSPGNHDAVRQAEPOPAFEGEIRSL-L 344  
*T. acidophilum* LNPLEQYANLAEYLVVDVEDVVKVFMVPGNHDTVRLSEPOPVTPGKIRD-L 342

*T. species 9°N* YKLNNAVIISNPAVINLHGRDFLIAHGRGIEDVVDVFIPG--RTHHKPAEA 622  
*T. kodakaraensis* YKLNNAVIISNPAVIRLHGRDFLIAHGRGIEDVVDVFVPN--RSHHRPAEA 632  
*P. furiosus* YKLNNAVIISNPAVIRLHGRDFLIAHGRGIEDVVGSVPG--LTHHKPLP 513  
*M. jannaschii* FNRDNIYFVGNPCTLNIHGFDTLLYHGRSFDDLVGQIRA--ASYENPVTI 488  
*M. maripaludis* FPKENVTFVGNPQVNMHGLDLIMYHGRSFDDIIGQISS--AQYTNPPSI 482  
*H. volcanii* MSAHDARITSNPMTLEGVNVMYHGVSLDEVIAELPADKASYDEPHKA 437  
*H. species NRC-1* MRAHDARITSNPSTVTIDGVSVLLYHGVSLDEVIAEHPSDVYDDPQNA 296  
*A. fulgidus* FPK-NVEHVGNEAYVDIEGVKVIYHGRSIDDIIISKIPR--LSYDEPQKV 391  
*T. acidophilum* FEP-NVAFLPNPYNLKLLEGKNVIVYHGMSLNDMIELIPG--ANYDSTGKA 389

*T. species 9°N* MVDLLKLRHLAPTFGNKVPVIAEDPEDTLVIESVPDLFQAGHVIVMEYRIY 672  
*T. kodakaraensis* MVELLKLRLHIAPTFGNKPVIAEDPEDTLVIESVPDLFQAGHVIVMQYKTY 682  
*P. furiosus* MVELLKMHRHVAFMFGGKVPVIAEDPEDLLVIEEVPDVVHMCHVIVYDAVVY 563  
*M. jannaschii* MKELIKRRLLCPTYGGRCPIAEPHKDYLVLDRIDILHTGHIVINGYGIY 538  
*M. maripaludis* MTELLKRRHLCTYGGRCPIAEPHVLYLAHTEPDIFHTGHIVINGYDNY 532  
*H. volcanii* MYQLLKKRHVAPQFGGHTRLAPEELDYLVMEDVDPDIFHTGHIVKLGWKY 487  
*H. species NRC-1* MELLKRRHVAFPFGGTRLPAEAEDHLAIDTVPDVFHTGHIVKLGVIH 346  
*A. fulgidus* MEELLKRRHLSPIYGGRTPLAPEREDYLVIEDVDPDILHCGHIVTYGTGFY 441  
*T. acidophilum* IEAILVRHLSFKYGGNTPMISAVDYHVIEEVPDIFITGHIVSHYIGNY 439

*T. species 9°N* NGVVFVINSGTWQAQTEFOKMVNIIPTPARVPIIDVETARLRAVVSFDQFC 722  
*T. kodakaraensis* NGVVFVINTGTWQAQTEFOKMVNIIPTPARVPIIDVETARLRAVVRFDQFC 732  
*P. furiosus* RGVLVNSATWQAQTEFOKMVNIIPTPAKVPPVVDIDTAKVVKVLDVDFSGWC 613

```

M. jannaschii      RGVVMVNSGTFEEDTDFQKRMGISSPTPAIVPIINMAKVGEKGHYLEWDRG 588
M. maripaludis    HGVVRMINSGTFEEDTDFQKRMGIKPTPGIPIQDLSKREQ--HMIEWNQG 580
H. volcanii        HNVLAVNSGCWCACTDFQKSVNIDPDAGYAPIVDLDTLNMTVRKFS---- 533
H. species NRC-1  HNVRLVNSGCWCHOTAFQESVNISSPDVATAPILDLDTLDITVHKFS---- 392
A. fulgidus        RGVFMVNSSTWCACTEFQKKNLNPMPGNVAVYRPGGEVIR---LRFYGE 488
T. acidophilum     KGVRYVNSSTWCSQTEYQKMMNFNPKPSKLTFLDLYSRSV--IVKDFDTT 487

T. species 9°N     EGV--- 725
T. kodakaraensis  EGV--- 735
P. furiosus        -----
M. jannaschii     VLEVRY 594
M. maripaludis    KIEIN- 585
H. volcanii        -----
H. species NRC-1  -----
A. fulgidus        -----
T. acidophilum     L----- 488

```

## B. polD-L multiple sequence alignment

```

T. species 9°N     ---MGEELYSPEMKAYFESLQRE-----IDRAYE 26
T. kodakaraensis  ---MSEEIYSPEMKAYFESLQRE-----IDRAYA 26
P. furiosus        ---MELPKEIEEYFEMLQRE-----IDKAYE 23
M. jannaschii     MIVMVHVACSENMKKYFENIVDE-----VKKIYR 29
M. maripaludis    ---MLHVSASKGMTEYFKNILDD-----VSNLYN 26
H. volcanii        ---MREEETRYFRRIEAR-----LDEAFD 21
H. species NRC-1  ---MRPTDETYFETLETG-----LDDAFE 21
A. fulgidus        ---MDATLDRFFPLFSESNEDFWRIEIRRYHESLMVELDRIYR 42
T. acidophilum     ---MSQKPFDELGYRKYITEK-----VREAFN 24

T. species 9°N     IARKARSQKDPKPSLDVEVFPQATDMAGRVESLVGPPGVAERIRELV-KEYG 75
T. kodakaraensis  IARKARAQKDPKPSDFDVEVFPQATDMAGRVESLVGPPGVAERIRELV-KEYG 75
P. furiosus        IAKKARSQKDPKPSDVEVFPQATDMAGRVESLVGPPGVAQRIRELL-KEYD 72
M. jannaschii     IEECRKKGFDPDTEVEIPLAADMADRVEGLVGPKGVAERIRELV-KELG 78
M. maripaludis    LAEECRKNGYDVTDHVEIPLAKDMADRVEGIVGPKNVAERIRELV-SEFG 75
H. volcanii        LEAAKATGYDPKTEVEIPVAKDMADRVENILGIDGVAERVRELE-GEMS 70
H. species NRC-1  VEAARERGEDPTPNVEIPVAKDMADRVENILGIDGVAERVRDLD-GEMS 70
A. fulgidus        IEAARKKGLDPELSVEIRIAKNMAERVEKLMNLQGLAKRIMELEEGGLS 92
T. acidophilum     VQEARAKGLDVS DHVEIPLASDMAERIEALIGIKGIAQEI RDL S-SRMS 73

T. species 9°N     KELAALKVVDEIIIEGKFGDLGSKEKYAEQAVRTALAILTEGIVSAPLEGI 125
T. kodakaraensis  KEIAALKVVDEIIIEGKFGDLGSKEKYAEQAVRTALAILTEGIVSAPLEGI 125
P. furiosus        KEIVALKIVDEIIIEGKFGDFGSKEKYAEQAVRTALAILTEGIVSAPLEGI 122
M. jannaschii     KEPAALEIAKEIVEGKFGNFD-KEKKAQAVRTALAVLTEGIVAAPLEGI 127
M. maripaludis    KEPAALEIAKEIVEGKFGFG-REVGAQAVRTALAVITEGIVAAPLEGI 124
H. volcanii        REEAALVLTDFVDGNVGDYDSREGKVEGAVRTAVALLTEGVVAAPIEGI 120
H. species NRC-1  REEAALVLDVDFVDRVGDYDTDAGKIEGAVRTAVALLTEGVVAAPIEGI 120
A. fulgidus        RELICFKVADEIVEGKFGEMPKEE-AIDKAVRTAVAIMTEGVVAAPIEGI 141
T. acidophilum     REEVSLEMSRRIAA---MFKDNRKEALDKAIVGLAILTEGILVAPLEGI 120

T. species 9°N     ADVKIKRNTWADNSEYLALYYAGPIRSSGGTAQALSVLVGDYVRRKGLD 175
T. kodakaraensis  ADVKIKRNEWADGSEYLALYYAGPIRSSGGTAQALSVLVGDYVRRKGLD 175
P. furiosus        ADVKIKRNTWADNSEYLALYYAGPIRSSGGTAQALSVLVGDYVRRKGLD 172
M. jannaschii     ADVKIKKN--PDGTEYLAIYYAGPIRSSGGTAQALSVLVGDVVRKAMGLD 175
M. maripaludis    AYVKIKKN--SDNSEYLAIYFAGPIRSSGGTAQALAVLVGDYVRRKMGD 172
H. volcanii        DRVEILEN--DDGTEFVNYYAGPIRSSGGTAQALSVLVADYARSLDID 168
H. species NRC-1  DRVEVNDN--DDGTQYVAVYYAGPIRSSGGTAQALSVLVADYARAMLGID 168
A. fulgidus        ARVRIDRE--N----FLRVYYAGPIRSSGGTAQAVISVLVADYVRRKAEIG 185
T. acidophilum     ADVYIGKN--QDGEYVYGISYAGPIRSGGGTAQALSVLVIGDVVRRRELGIS 168

T. species 9°N     RFKPSEEHIERMVVEEIDL YHRAVTRLQVHPEADEVRLAMRNIEIEITGEE 225
T. kodakaraensis  RFKPSEEHIERMVVEEVDLYHRAVTRLQVHPEADEVRLAMRNIEIEITGEE 225
P. furiosus        RFKPSGHIERMVVEEVDLYHRAVSRLOVHPSDEVRLAMRNIEIEITGEA 222
M. jannaschii     RYKPTEDEIERVVEEVELYQSEVGSFOYNPDTADEIRTAIRNIEIEITGEA 225
M. maripaludis    RFKPTEDEVERYVEEVDLYQSEVTTFOYQPKAEIRVAVRNISVEITGEA 222
H. volcanii        EYKARTDEVERYVEEINLYDKETG-LOYSPKDKESRFIAENMIMLDGEA 217
H. species NRC-1  AFKPRDDEIERVVEEVDLYDSETG-LOYSPKDAETTFITEHCVMLDGEA 217
A. fulgidus        RYVPTEEELLRYCEEIPLYKKVAN-LOYLPSDEEIRLIVSNCFICIDGEP 234
T. acidophilum     RFQPTEDEIERVVEEIESVDRIKH-LOYMPTPDEIKLVVRNSFCICIDGEG 217

```

*T. species* 9°N TDKVEVS-HRNVPGVETNHLRGGAILVLAEGVLQKAKMLVKYIDKMGVEG 274  
*T. kodakaraensis* TDKVEVS-HRNVPGVETNHLRGGAILVLAEGVLQKAKMLVKYIDKMGIEG 274  
*P. furiosus* TDDVEVS-HRDVEGVETNQLRGGAILVLAEGVLQKAKMLVKYIDKMGIDG 271  
*M. jannaschii* TDDVEVSGHRDLPRVETNQLRGGALLVLEGVLLKAPKILRHVDKLGIEG 275  
*M. maripaludis* TDDVEVSGHRDLPRVETNQIRGGALLVLEGVLLKAPKILRHVDKLNIEG 272  
*H. volcanii* TGDVEVSGYRDLERVDITNSARGGMCLVMAEGIALKAPKIQRYTRQLDEVD 267  
*H. species* NRC-1 TGNEEVDGFRDLERIDITNSPRGGMCLVLAEGIALKAPKIQRYTRNLDEVA 267  
*A. fulgidus* TESAEVSGYRNLPRVETNVRVGGMALVIAEGIALKAPKILKMMVDEVGIEG 284  
*T. acidophilum* SEEEVSGHRDMERIKTNRIIRGGMCLVLCCEGLVQKAKMLKLYTSSMHLDD 267

*T. species* 9°N WDWIKEFVEAKEKGSSEEPKADESKAEDSGAR--EVAEKVEKGFYEL 322  
*T. kodakaraensis* WDWIKEFVEAKEKGSSEE-NKDESKAEDTGTESVAEKKNVEKGFYEL 323  
*P. furiosus* WEWLKEFVEAKEKGEIEE---SESKAEESKVVET---RVEVEKGFYK 314  
*M. jannaschii* WDWLKDLSKKEEKEEEDKDEKVDDEEID-----EEEEISGWWRD 315  
*M. maripaludis* WDWLKEKLSKKEEVIEELEE--ENDEYN-----YEDEEDLSQYED 310  
*H. volcanii* WPNLQDLIDGTIGKDDNAANADDAGDDGD-----EAEATEDPDAEA 309  
*H. species* NRC-1 WPNLQDLIDGTIG-ADDAEDTPDAGSDSD-----ATDEGDAPSAST 308  
*A. fulgidus* WEWLDALIK-----GGGDSG-----SEEEK----- 304  
*T. acidophilum* WNFLANLGGKAEGKSS----- 283

*T. species* 9°N YERF-----RANIAPNKKYTKETIGGRPLFAEPSENGGFRLRYGRS 366  
*T. kodakaraensis* YEFK-----RANIAPNKKYTKETIGGRPLFAEPSTNGGFRLRYGRS 367  
*P. furiosus* YEFK-----RAEIPASEKYAKEIIGGRPLFAGPSENGGFRLRYGRS 358  
*M. jannaschii* VK-----IEANKFISEVIAIGRPFVAHPSKVGGFRLRYGRS 354  
*M. maripaludis* YE-----VEAVTKFIGEVIAGRPFVSHPSKKGGFRLRYGRS 349  
*H. volcanii* DDAESDAPDGPTRVEPATKFLRDLIAGRPVFGHPSAPGGFRLRYGRAN 359  
*H. species* NRC-1 DAE-----PPRAAPSDKFLRDLIAGRPFVGHPSKNGGFRLRYGRAN 352  
*A. fulgidus* -----AVIKPKDKYLSDIVAGRPFVLSHPSRKGGFRLRYGRAN 343  
*T. acidophilum* -----KKSDFLKDIVAGRPFVSHPSRPGGFRLRYGRS 319

*T. species* 9°N GFATWSVNPATMLILDEFIAIGTQMKTERRPGKGCIVTATTVEGPIVKLK 416  
*T. kodakaraensis* GFATWSVNPATMLILDEFIAIGTQMKTERRPGKGCIVTATTVEGPIVRLK 417  
*P. furiosus* GFATWSINPATVVLVDEFLAIGTQMKTERRPGKAVVTATTAGPIVKLK 408  
*M. jannaschii* GFATQGFHPALMYLVDEFMVGTQLKTERPGKATCVVVDVSIPIPIVKLK 404  
*M. maripaludis* GFATDGFHPALMYLVDFMVGTLQKTERPGKATCVVVDVSIPIVKLN 399  
*H. volcanii* GFATAGVHPATHHIVDDFIATGTQIKTERPGKAGGVVVDVSIPIGPTVRIA 409  
*H. species* NRC-1 GNTAGVHPATHHLLDDFLATGTQIKTERPGKAAGIVVDVSIPIGPTVCLA 402  
*A. fulgidus* GFATVGVNPATMYLL-ETVAVGTQLKTERPGKAGGVVVDVSIPIGPTVRLK 392  
*T. acidophilum* GLAASLNPATMYIMGKFLAIGTQIKTERPGKAAAVTFCDTIDGPTVLLK 369

*T. species* 9°N DGSVVRVDDYETALRVKNEIEELLYVGDALVNFVDFVENNQTLLPANYVE 466  
*T. kodakaraensis* NGSVVRVDDYETALKVRNEVDELLYVGDALVNFVDFVENNQTLLPANYVE 467  
*P. furiosus* DGSVVRVDDYNLALKIRDEVVEELLYVGDALVNFVDFVENNQTLLPANYVE 458  
*M. jannaschii* NCDVIRVDTIEKAMDVRNRVEELFLGDVLVNFGDFLENNHPLPSCWCE 454  
*M. maripaludis* DESVLKIDTVEKAKQYTDVQVEELFLGDVLVNFGDFLENNHPTVLPSSWCT 449  
*H. volcanii* NCDVRRIDDPEEAKELQNGVEKLLDLEYLNVNFGDFVENNHPAPASVVF 459  
*H. species* NRC-1 NCDVRRINDPADALDVRNGVAELLDVGEYLNVNFGDFVENNHPAPASVYAP 452  
*A. fulgidus* NCDVVKINTLSEAKALKEGVAALLDLELLINYNFGDFLENNHPIIPASVY 442  
*T. acidophilum* NCDHVKINDIEKAREVYDDVETDAEELIAYGDFLENNYPIPTPSFTV 419

*T. species* 9°N EWWVQELVKAIEELYEVELKPFSDNPRAVEEAAEYLEVDPDFLESLLRD 516  
*T. kodakaraensis* EWWVQELVQAIKDLYEVELQPFPAENDREAVEEAAEYLEVDPDFLWNLK 517  
*P. furiosus* EWWIQEFVKAVNEAYEVELRPFENPRESVEEAAEYLEVDPDFLAKMLYD 508  
*M. jannaschii* EWYEKILI-----ANNIEYDKDFIK----- 474  
*M. maripaludis* EWYEKILK-----SQNLEYTEEFIK----- 469  
*H. volcanii* EWWIQEFATEAN-----VQALRDPDAVDLE---- 485  
*H. species* NRC-1 EWWIQDLDAAGAD-----VQALRDSPLYVDLT---- 478  
*A. fulgidus* EWWIQEAEKAG-----LRG----DYS---- 459  
*T. acidophilum* EWWEQYLPDGVNAK----- 433

*T. species* 9°N PLRVKPSVELAIHLSKVLDFPHFYTYLWNTLKPVEVEELQKALLN-AQ 565  
*T. kodakaraensis* PLRVKPDVETAHLSSTVLDIPLPHFYTYLWNTLQPEVEVEELQKALLG-AQ 566  
*P. furiosus* PLRVKPPVELAIHFSEILEIPLPHFYTYLWNTVMPKDVRLWGLKDKAT 558  
*M. jannaschii* ----NPKPEEAVKFALETKTPLHPRFTYHWHVSKEDIILLRNWLK--- 517  
*M. maripaludis* ----NPGQNEAVNYAKITKTPLHFKYTYFVHWDISKENIFSLRSWVIG--- 512  
*H. volcanii* ----EPSVEQALSWATEFDAPLHPVYTYLWHDISVERFDALADAVAAGEI 531  
*H. species* NRC-1 ----APTADQAMAWATDYDAPLHPAYTYLWHDIDVEQFRALADAVADAHT 524  
*A. fulgidus* ----KISEEALKLCDFHVLHPDYTYLWHDISVEDYRILRNFVSDNGI 505  
*T. acidophilum* ----DIDQFSAVEISRKYGIPLPHFYTYLWHDISFEDLEFLVKNAEQWSI 479

*T. species* 9°N IEWDEFKRL-----KFAKRVILENDPQ--IKRYLELLGLPRLER 603  
*T. kodakaraensis* IEWADEFKRN-----RFAKRVILENDKN--IKRYLELLGLPRLER 604  
*P. furiosus* IEWGTFRGI-----KFAKKIEISLDDLGLSKRTLELLGLPHTVRE 598  
*M. jannaschii* -GKEDSLEG-----KKVWIVDLEIEEDKKAKRILELIGCCHLVRN 556  
*M. maripaludis* -GKYNPSND-----SWELNYDPEDEEILNAKRYLELIGCPHTVME 551  
*H. volcanii* VAAEADGGTTAALEHDNEPEHGLEGTVLVDNAPEIREALEHLLVAHRQTD 581  
*H. species* NRC-1 DASDDDD-----RGVLVDHTTTVRETEALLVTHHQGD 558  
*A. fulgidus* IEGKHGK-----SVLLLPHYDSRVKEILEALLEHKVRE 538  
*T. acidophilum* TEDGMRVPY-----PAFDVFIIRLGIEFRRSG 505

*T. species* 9°N TEDRRKVIVIDYVSSAALTPLGN-----LEWEFKAKPFYTVIIDII 644  
*T. kodakaraensis* VEKRRKVIIVVEYVWSAALTPLGN-----LEWEFKAKPFYTVIIDII 645  
*P. furiosus* G-----IVVVVDYVWSAALTPLGN-----LEWEFKAKPFYTVIIDII 634  
*M. jannaschii* K---KVIIEEYVLLYSVGFVDENK---KDLVENIEKILESAKNSMHII 599  
*M. maripaludis* E---KVEIFEYVFLYSVGYDFDEK---RDMIDNIDEKLQNTKNNMHFI 594  
*H. volcanii* E---ALRVVPVRELARSLGLTDDRERTWELDDLSEARARTWDDGDNAVEAV 628  
*H. species* NRC-1 D---TIRVDDWVRLARSLGVTESLDREWET--LSEAAAEPW---NAVRAV 600  
*A. fulgidus* S---FIVIETWRAFIRCLGLDEKLSKVSEVS-----GKDVLEIV 574  
*T. acidophilum* D---YLIIRDYVLLISVGYDVRNGK-----IVNVKKYERKGSVMETV 545

*T. species* 9°N NESNP IKLRDRGISWIGARMGRPEKAKERKMKKPPVQVLFPIGLAGGQSRD 694  
*T. kodakaraensis* NENNRIKLRDRGISWIGARMGRPEKAKERKMKKPPVQVLFPIGLAGGQSRD 695  
*P. furiosus* NENNOIKLRDRGISWIGARMGRPEKAKERKMKKPPVQVLFPIGLAGGSSRD 684  
*M. jannaschii* NLLAPFEVRNRYVYVIGARMGRPEKAAPKMKKPPVNGLFPIGNAGGQVRL 649  
*M. maripaludis* NTIAPFEIRRNAYIYVIGARMGRPEKAARAKMKKPPVNGLFPIGNAGALVRL 644  
*H. volcanii* NEVAPFNVRERAPTRIGNRMGRPEKSERDLSFAVHTLFPVIGDAGGQSRD 678  
*H. species* NRC-1 NEVAPFVQERAPTRIGNRMGRPEKSERDLSFAVHTLFPVIGDAGGQSRD 650  
*A. fulgidus* NGISGIKVRPKALSRIIGARMGRPEKAKERKMKKPPPHILFPVGMAGGNTRD 624  
*T. acidophilum* NYLSGLIIKPRAPTRVSRILGRPEKAGDKMKKPPMVHSLFPVVEYGEARS 595

*T. species* 9°N IKKAAEEG-----KTAKVEIAFFKPKCGHTGPEHLCPVCGTRKELLW 737  
*T. kodakaraensis* IKKAAEEG-----KTARVEIAFFKPKCGHVGPPEHLCPVCGTRKELLW 738  
*P. furiosus* IKKAAEEG-----KIAEVEIAFFKPKCGHVGPETLCPVCGTRKELIW 727  
*M. jannaschii* INKAVEEN-----NTDDVDVSYTRPNCCKISLYRVCPFCGT----- 686  
*M. maripaludis* INKAVEEG-----KTDEIEIANVKES--CGKVSLYRTPFCPCGN----- 680  
*H. volcanii* VGDAAARHR--GESGKRQISVRLGQRKCPDCCGAFGFKSKCPDCCGHTEPHY 727  
*H. species* NRC-1 VADAARYAPDMSDTPGEIPVRVGRDVPSCDEHTYESRCPDCCDWTDPHY 700  
*A. fulgidus* IKNAINVTKSYNAKKGIEVEIAIRKCPCCGKETFWLKCQVCGELTEQLY 674  
*T. acidophilum* IIGANKNS-----EGSYKAEVFFYRNSCGFETPTPVCPCCG----- 633

*T. species* 9°N HCPKCNVDYPESEAKEFGFRCPDVELKPYAEREIKPSELLRRAMDNVK 787  
*T. kodakaraensis* HCPKCGADYPESDAKDFNYRCPKCDVELKPYAEREIKPADLLRQAMDNVK 788  
*P. furiosus* TCPKCGAETNSQAEGYSYSCPKCNVCLKPFTKRKIKPSELLNRAMENVK 777  
*M. jannaschii* -----KVELDNFGRIKAPLKDYWYAAALKRLG 712  
*M. maripaludis* -----SVEPTGPSRIKLPKIDYWKTLLENLK 706  
*H. volcanii* ECDDCG--SVIEPDESGRVYCERCEWDVESAEWQDVLNSEYRDALERVG 775  
*H. species* NRC-1 ECRDCG--AVATPDESGRVEPCNCRDLNVTQVIDINDEYHGALRAVG 748  
*A. fulgidus* YCPSCR--MKNTSS-----VCESGCRECEGYMKRVDLRELYEEAIALNG 717  
*T. acidophilum* -----HCSPLGKGTGSIDLESILNRAESILG 659

*T. species* 9°N VYGI--DRLKGVKGMTSGYKMAEFLKGLLRVKNDVYVFKDGTIRFDATD 835  
*T. kodakaraensis* VYGI--DRLKGVKGMTSGYKMAEFLKGLLRVKNDVYVFKDGTIRFDATD 836  
*P. furiosus* VYGV--DKLKGVMGMTSGWKIAEFLKGLLRKANEVYVFKDGTIRFDATD 825  
*M. jannaschii* INKP--GDVCKIKGMTSKQKIVEFLEKAILRAINEVYVFKDGTIRFDCTD 760  
*M. maripaludis* INKP--GDVCKIKGMTSKDKIIEFLEKAILRAKNNIYVFKDGTIRFDCTD 754  
*H. volcanii* ERESSQILKGVKGLTSANKTPEFIEKGVLRRAKHDVVSFKDGTIRYDMDT 825  
*H. species* NRC-1 ERENADFQLKGVKGLLSAEKTPPEMAKGVLRRAKHDVTAFKDGTIRYDMDT 798  
*A. fulgidus* EYDS--FDTIKGVKGMTSKTKIPERLEKGIILRVKHGVVFKDGTARFDATD 766  
*T. acidophilum* ISLDSLKEFKGVKGLMSKEKVAEPIEKGIILRAVHDISVKNKGTIRFDMSD 709

*T. species* 9°N APIITHFKKEIGVSVEKLRELGYTHDFEGKPLERDDQIVELKVODIILSY 885  
*T. kodakaraensis* APIITHFKKEIGTSVEKLRELGYTHDFEGKPLERDDQILELKVODVILPY 886  
*P. furiosus* APIITHFREREIGVSVEKLRELGYTHDFEGKPLVSEDQIVELKPODVILSK 875  
*M. jannaschii* VEVTHFKKEINVTVEKLRELGYDKDIYGNELVDGQVVELKPODVIPE 810  
*M. maripaludis* VEVTHFKKEIVHPIEKLSGLYKLDIHGNPLENEDQVLELKVODVIPE 804  
*H. volcanii* LQVTAVRPEELDVTADHFRELGYETDIDGEPFRFDDQIVELKVODIVLSN 875  
*H. species* NRC-1 LQVTAVTFAELDVTAGQFRELGYNQDIHGDPLEHDDQIVELRVQDVVLS 848  
*A. fulgidus* LPIITHFKKEIGVSVEKLRELGYERDYKGAELKNENQIVELKPODVIIPK 816  
*T. acidophilum* IPIITHFRYREIGIDERTLADLGYEVR-----DVNELFPODVIIPR 749

|                         |                                                        |      |
|-------------------------|--------------------------------------------------------|------|
| <i>T. species 9°N</i>   | EAGKYLKVARFVDDLLEKFFYGLPRFYNAEKMEDLIGHLVIIGLAPHTSAG    | 935  |
| <i>T. kodakaraensis</i> | EAGRYLLKVARFIDDDLLEKFFYGLPRFYNAEKMEDLVGHLLVIIGLAPHTSAG | 936  |
| <i>P. furiosus</i>      | EAGKYLLRVARFVDDLLEKFFYGLPRFYNAEKMEDLIGHLVIIGLAPHTSAG   | 925  |
| <i>M. jannaschii</i>    | SCAEYFVKVANFIDDDLLEKFFYKVERFYNVKKKEDLIGHLVIIGMAPHTSAG  | 860  |
| <i>M. maripaludis</i>   | SCMDYFLNVSGFIDDDLLEKFFYKDRFYNVNTRDELVGHLLIIGMAPHTSAG   | 854  |
| <i>H. volcanii</i>      | GAQHMMQTADFVDDLLDQFYGLDRFYIEERDDLIIEIVFGMAPHTSAA       | 925  |
| <i>H. species NRC-1</i> | GAADHMLKTADFVDDLLTQYYGLDAFYDLDDRDBLVGELVFGMAPHTSAA     | 898  |
| <i>A. fulgidus</i>      | SGAEYLLRVANFIDDDLVKFFYKMEPFYNAKSVEDLIGHLVIIGLAPHTSAG   | 866  |
| <i>T. acidophilum</i>   | KAAKYLNFVSRFIDDDLVKYYNMPPFYSLESEEDLIGHLIIIGLAPHTSGG    | 799  |
|                         |                                                        |      |
| <i>T. species 9°N</i>   | IIIGRIIGFSDVLVGYAHPYHAAKRRNCDGDEDAVMLLLDALLNFSKYYL     | 985  |
| <i>T. kodakaraensis</i> | IIIGRIIGFSDVLVGYAHPYHAAKRRNCDGDEDAVMLLLDALLNFSKYYL     | 986  |
| <i>P. furiosus</i>      | IVGRIIGFVDALVGYAHPYHAAKRRNCDGDEDSVMLLLDALLNFSRYYL      | 975  |
| <i>M. jannaschii</i>    | MVGRIIGYTKANVGYAHPYHAAKRRNCDGDEDSFFLLLDALNFSKFFL       | 910  |
| <i>M. maripaludis</i>   | MVGRIIGYSNANVGYAHPYHAAKRRNCDGDEDAFFLLLDAFMNFSKRFL      | 904  |
| <i>H. volcanii</i>      | VVGRVVGFTTAAVGYAHPYHAAKRRNCDGDEDCVMLLMDGLLNFSSKYL      | 975  |
| <i>H. species NRC-1</i> | VVGRVAGFTSASVGYAHPYHAAKRRNCDGDEDCVMLLMDGLINFSSKYL      | 948  |
| <i>A. fulgidus</i>      | VLGRIIGFSDVLVGYAHPYHAAKRRNCDGDEDCFMLLLDGLLNFSSKFL      | 916  |
| <i>T. acidophilum</i>   | VVGRIGFSDVNAFYAHPYHAAKRRNCDGDEDSVMLLMDGLNFSARYL        | 849  |
|                         |                                                        |      |
| <i>T. species 9°N</i>   | PEKRRGGKMDAPLVVTTTRLDPREVDSEVHNMDVVRYYPLEFYEATYEMKSP   | 1035 |
| <i>T. kodakaraensis</i> | PEKRRGGKMDAPLVVTTTRLDPREVDSEVHNMDVVRYYPLEFYKATYELKSP   | 1036 |
| <i>P. furiosus</i>      | PEKRRGGKMDAPLVITTRLDPREVDSEVHNMDVVRYYPLEFYEATYELKSP    | 1025 |
| <i>M. jannaschii</i>    | PDKRRGGQMDAPLVLTITLDPKVEVDGEVHNMDTMWSYPLEFYKTELEMPSP   | 960  |
| <i>M. maripaludis</i>   | PDKRRGGQMDAPLVLTITLDPKVEVDGEVHNMDSMWEYPLEFYKSLGIAPI    | 954  |
| <i>H. volcanii</i>      | PDKRRGGQMDAPLVMSRRIDPSEIDDEAHNMDIVRQYREFYEAATLRMEDP    | 1025 |
| <i>H. species NRC-1</i> | PDKRRGGRMDAPLVMSRRIDPAEIDDEAHNMDIDREYREFYEAATRELADP    | 998  |
| <i>A. fulgidus</i>      | PDKRRGGQMDAPLVLTALVDPREVDKVEVHNMDIVERYPLEFYEATMRFPSP   | 966  |
| <i>T. acidophilum</i>   | PSTRGGGLMDAPLVLSVLINDEIDKEALNVDTLSTRYPLFYEAERHASP      | 899  |
|                         |                                                        |      |
| <i>T. species 9°N</i>   | KE-IKFIERVEDRLGKPEMYEGIKFTHDIDDIGLGPKMSLYKQGLDMVEK     | 1084 |
| <i>T. kodakaraensis</i> | KE-VKVIERVEDRLGKPEMYEGIKFTHDIDDIGLGPKMSLYKQGLDMEEK     | 1085 |
| <i>P. furiosus</i>      | KELVRVIEGVEDRLGKPEMYEGIKFTHDIDDIALGPKMSLYKQGLDMEEK     | 1075 |
| <i>M. jannaschii</i>    | KEVKFEMETVEDRLGKPEQYEGIGYTHETSRIIDLGPKVCAYKTLGSMLEK    | 1010 |
| <i>M. maripaludis</i>   | KEIKKMMETIEDRLDKDSQYEGIGYTHETSRIIDEGPPICAYKTLGSMMEK    | 1004 |
| <i>H. volcanii</i>      | DDWEDEVTAEEYLGTDRREYTFDHTDFTDIAAGPDL SAYKTLGSMMDK      | 1075 |
| <i>H. species NRC-1</i> | EDVADLITLAEESTVGTDEEYTFGHTHATSNIHLGPSLSAYKTLGSMMDK     | 1048 |
| <i>A. fulgidus</i>      | KEMEDYVEKVKDRLLKDESRCFLFFTHDENTIAAGVKESAYKSLKTMQDK     | 1016 |
| <i>T. acidophilum</i>   | AEIEDTMMTMKVRIKKTGTIMSSYTMDSIDNSGVLVSSYKTLGTIDEK       | 949  |
|                         |                                                        |      |
| <i>T. species 9°N</i>   | VERQLALAEIRIAVDEHHVAETILNSHLIPDLRGNLRSFTTQEFRCVKCN     | 1134 |
| <i>T. kodakaraensis</i> | VARQLALAEIRIAVDEHHVAETILNSHLVPLDRGNLRSFTTQEFRCVKCN     | 1135 |
| <i>P. furiosus</i>      | VKROLTLAEIRIAVDQHYVAETILNSHLIPDLRGNLRSFTTQEFRCVKCN     | 1125 |
| <i>M. jannaschii</i>    | TTSQLSVAKKIRATDERDVAEKVIQSFHFPDLIGNLRAFSRQAVRC-KCG     | 1059 |
| <i>M. maripaludis</i>   | TSAQLAVAKKIRATDERDVAEKVIQSFHFPDLIGNLRAFSRQGVRC-KCG     | 1053 |
| <i>H. volcanii</i>      | MDAQLFLARKLRAVDETDVAERVIEYHFLPDLIGNLRAFSRQETRCCLDCG    | 1125 |
| <i>H. species NRC-1</i> | MDAQLFLARKLRSVAETDVAERVIEYHFLPDLIGNLRAFSRQETRCCLDCG    | 1098 |
| <i>A. fulgidus</i>      | VYROMELARMIVAVDEHDVAERVINVHFLPDLIGNLRAFSRQEFRCRTRCN    | 1066 |
| <i>T. acidophilum</i>   | INEQLGLAKKLRAVDADDVAARVISTHFLPDMYGNFKKFFSDEFRCRTRCN    | 999  |
|                         |                                                        |      |
| <i>T. species 9°N</i>   | TKYRRPPLIGRCPKCGG-KIVLTVSKGAVEKYLPTAKMLVTRKYVKDYTR     | 1183 |
| <i>T. kodakaraensis</i> | TKYRRPPLTGKCPKCGG-KIVLTVSKGAEIKYLPTAKMLVTRKYVKDYTR     | 1184 |
| <i>P. furiosus</i>      | TKYRRPPLDGKCPVCGG-KIVLTVSKGAEIKYLGTAKMLVANYNVKPYTR     | 1174 |
| <i>M. jannaschii</i>    | AKYRRIPPLKGGKPKCGS-NLILTVSKGAVEKYMVAEKMAEYVNVNDYIK     | 1108 |
| <i>M. maripaludis</i>   | AKYRRMPLKGVCRKCGS-RLILTVSKGAVEKYMNVQSQTMAEKYDASDYIK    | 1102 |
| <i>H. volcanii</i>      | EKYRRMPLSGDCRECCGG-RVNLTVHQS SVNKYMDTAIQVAEEFDCRDYTK   | 1174 |
| <i>H. species NRC-1</i> | EKYRRMPLSGDCRECCGG-RVNLTVHQS SVNKYMDTAMRVATEYDCREYTK   | 1147 |
| <i>A. fulgidus</i>      | TKYRRIPPLVGGKCLKCGN-KLTLTVHSSIMKYLELSKFLCENFNVSSYTK    | 1115 |
| <i>T. acidophilum</i>   | AKYRRIPPLSGRCQKCGSTSLTLTIHKESVVKYLNETLKI AENYRLPDYMLK  | 1049 |
|                         |                                                        |      |
| <i>T. species 9°N</i>   | ORICLTEKDIKTLFETVLPKQRTLLGFSADVCEKMIKERTGSSNGKNGY      | 1233 |
| <i>T. kodakaraensis</i> | ORICITEKDIKTLFENVFPEKQRTLMGFSADICEKMKV KERTGHSNGKNGY   | 1234 |
| <i>P. furiosus</i>      | ORICLTEKDIDSLFEYLFPEAQLTLIVDPNDICMKMIKERTG-ETVQGG      | 1223 |
| <i>M. jannaschii</i>    | ORLKIIKEGINSIFE-----                                   | 1123 |
| <i>M. maripaludis</i>   | ORLEIIKSGIDSLEFV-----                                  | 1117 |
| <i>H. volcanii</i>      | ORLEVLEKSLESVFE-----                                   | 1189 |
| <i>H. species NRC-1</i> | ORLEIMDRRLESVFE-----                                   | 1162 |
| <i>A. fulgidus</i>      | ORLMLLEQEI KSMFE-----                                  | 1130 |
| <i>T. acidophilum</i>   | ARIDNLRARTIKETFP-----                                  | 1064 |
|                         |                                                        |      |
| <i>T. species 9°N</i>   | LDGFNGKNGKAKK-----AKAENEAKREKMPKAEKSKDLK-----          | 1268 |
| <i>T. kodakaraensis</i> | LDEFNGKNGKASKKSGSLASKLSGKGPEPSKKKESAKPKRSEKVKNLTSF     | 1284 |
| <i>P. furiosus</i>      | LENFNSSGNNGKK-----IEKKEKKAK-----                       | 1245 |

|                         |                                           |      |
|-------------------------|-------------------------------------------|------|
| <i>M. jannaschii</i>    | -----NEKSRQ-----                          | 1129 |
| <i>M. maripaludis</i>   | -----NDKRRQ-----                          | 1123 |
| <i>H. volcanii</i>      | -----NDKNKQ-----                          | 1195 |
| <i>H. species NRC-1</i> | -----DDTNKQ-----                          | 1168 |
| <i>A. fulgidus</i>      | -----NGTEKQ-----                          | 1136 |
| <i>T. acidophilum</i>   | -----DTEEEEKPE-----                       | 1073 |
|                         |                                           |      |
| <i>T. species 9°N</i>   | -----KEVKKEKAKTR-RKRISLDEFFGS-            | 1291 |
| <i>T. kodakaraensis</i> | EAAAKNEQARGTAGNAKKAESEKPKRKRKRGISLDEFFGS- | 1324 |
| <i>P. furiosus</i>      | -----EKPKKK--KVISLDDFFSKR                 | 1263 |
| <i>M. jannaschii</i>    | -----VKLSDEFFKIG                          | 1139 |
| <i>M. maripaludis</i>   | -----VKIEDFFK--                           | 1131 |
| <i>H. volcanii</i>      | -----SGIADFFM---                          | 1202 |
| <i>H. species NRC-1</i> | -----SGISDFFM---                          | 1175 |
| <i>A. fulgidus</i>      | -----VSISDFFV---                          | 1143 |
| <i>T. acidophilum</i>   | -----PREVKITGLDMY-                        | 1085 |

**Supplementary Figure 1. Multiple sequence alignment of polD amino acid sequences. (A)**

The amino acid sequences of polD-S from 9°N, *Thermococcus kodakarensis* (GI:57641837), *Pyrococcus furiosus* (GI:2967437), *Methanocaldococcus jannaschii* (GI: 499172620), *Methanococcus maripaludis* (GI:45357571), *Haloferax volcanii* (GI:490144623), *Halobacterium* sp. NRC-1 (GI:15791200), *Archaeoglobus fulgidus* (GI: 499181746) and *Thermoplasma acidophilum* (GI:499203109) were aligned using ClustalW. Conserved amino acids D507 and H554 in the 3'-5' exonuclease active site that were mutated to alanine are highlighted in black. (B) PolD-L (lacking inteins) amino acid sequences from 9°N, *Thermococcus kodakarensis* (GI:57641838), *Pyrococcus furiosus* (GI:2967437), *Methanocaldococcus jannaschii* (GI:499173567), *Methanococcus maripaludis* (GI:45047149), *Haloferax volcanii* (GI:48927395), *Halobacterium* sp. NRC-1 (GI:15791139), *Archaeoglobus fulgidus* (GI:11499311), and *Thermoplasma acidophilum* (GI:16081956) were aligned using ClustalW. Catalytic aspartate residues (D964 and D966) essential for DNA polymerization (Shen et al. 2001) are highlighted in black. Conserved amino acids with 100% identity (red), 90% identity (green) or 74% identity (yellow) are highlighted.
